# Supplementary material
Source: Springer Nature journal article supplement (https://www.springermedizin.de/resource/supplementary/12871_2013_328_MOESM2_ESM.pdf/9429116)

## RESPONDERS

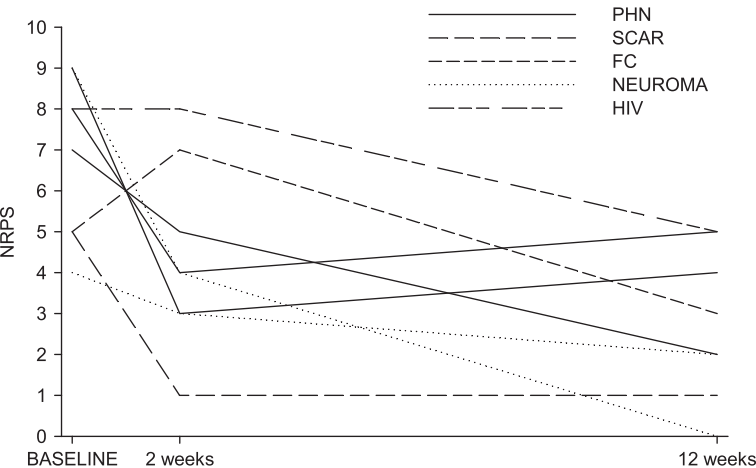

## NON-RESPONDERS

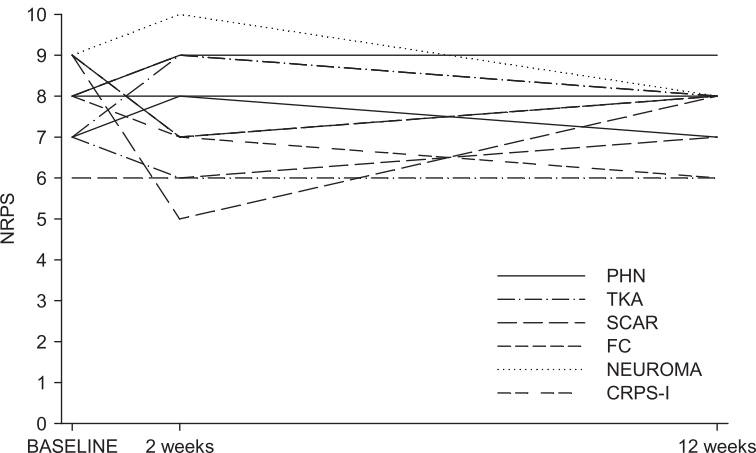

Supplement: MOESM2 [file 9429116]
